# Supplementary material
Source: publisher site journal article supplement (https://www.dovepress.com/article/463251)

**Table S1. Baseline characteristics in survival group and early in-hospital death group.**

| **Characteristics** | **Normal range** | **Death (n=87)** | **Survivors (n=599)** | ***P*-value** |
| --- | --- | --- | --- | --- |
| Age (years) † | - | 70 (64-77) | 65 (57-72) | <0.001 |
| Gender (male) & | - | 49 (56.3) | 280 (46.9) | 0.100 |
| Days from onset † | 6 (4-8) | 6 (5-8) | 6 (4-8) | 0.683 |
| Hospital stay (days)† | 10 (6-15) | 4 (3-5) | 12 (8-16) | <0.001 |
| From onset to end of observation (days)† | 17 (12-21) | 10 (8-12) | 18 (14-22) | <0.001 |
| **Comorbidities, *n* (%)**& |  |  |  |  |
| Hypertension | - | 23 (26.4) | 135 (22.5) | 0.420 |
| Diabetes | - | 15 (17.2) | 93 (15.5) | 0.681 |
| Coronary artery disease | - | 6 (6.9) | 46 (7.7) | 0.797 |
| Chronic liver disease | - | 14 (14.1) | 159 (26.5) | 0.036 |
| Cerebrovascular disease | - | 2 (2.3) | 56 (9.4) | 0.027 |
| Chronic lung disease | - | 8 (9.2) | 80 (13.4) | 0.278 |
| Cancer | - | 5 (5.8) | 15 (2.5) | 0.093 |
| **Complications, *n* (%)**& |  |  |  |  |
| Myocardial injury | - | 81 (93.1) | 315 (52.6) | <0.001 |
| Liver injury | - | 48 (55.2) | 212 (35.4) | <0.001 |
| Renal injury | - | 31 (35.6) | 85 (14.2) | <0.001 |
| Central nervous system lesion | - | 32 (36.8) | 46 (7.7) | <0.001 |
| Bleeding | - | 16 (18.4) | 29 (4.8) | <0.001 |
| Pulmonary infection | - | 39 (44.8) | 246 (41.1) | 0.506 |
| Multiple organ dysfunction syndrome | - | 65 (74.7) | 323 (53.9) | <0.001 |
| Acid-base imbalance | - | 21 (24.1) | 78 (13.0) | 0.006 |
| Electrolyte imbalance | - | 27 (31.0) | 242 (40.4) | 0.095 |
| **Laboratory findings**† |  |  |  |  |
| cardiac troponin I | 0-0.04 ng/mL | 0.320 (0.100-1.015) | 0.044 (0.020-0.101) | <0.001 |
| Aspartic transaminase | 15-40 U/L | 467 (223-896) | 125 (64-243) | <0.001 |
| Lactate dehydrogenase | 120-250 U/L | 900 (800-1471) | 587 (367-900) | <0.001 |
| Creatine kinase | 50-310 U/L | 1482 (494-2000) | 412 (180-987) | <0.001 |
| CK-MB | 0-25 U/L | 36.5 (20.0-64.8) | 17.0 (11.0-28.0) | <0.001 |
| Blood urea nitrogen | 3.1-8.0 mmol/L | 7.6 (6.1-11.3) | 5.6 (4.0-7.8) | <0.001 |
| Creatinine | 57-97 μmol/L | 78.6 (65.2-125.7) | 64.8 (53.7-81.0) | <0.001 |
| Uric acid | 202-416 μmol/L | 346 (250-482) | 245 (188-320) | <0.001 |
| Alanine aminotransferase | 9-50 U/L | 149.4 (81.0-234.6) | 66.0 (38.6-117.5) | <0.001 |
| Total bilirubin | 0-18.8 μmol/L | 11.6 (9.0-17.3) | 9.9 (7.4-13.2) | 0.001 |
| Direct bilirubin | 0-6.8 μmol/L | 6.3 (4.2-10.0) | 4.3 (3.3-6.0) | <0.001 |
| Total protein | 65-85 g/L | 55.2 (51.5-60.1) | 57.2 (53.0-61.4) | 0.020 |
| Albumin | 40-55 g/L | 29.0 (27.2-32.6) | 31.8 (28.8-34.5) | <0.001 |
| Globulin | 20-40 g/L | 25.4 (22.0-29.5) | 25.6 (22.7-28.1) | 0.878 |
| γ-glutamyl transferase | 11-49 U/L | 65.0 (34.0-113.0) | 31.6 (20.0-63.9) | <0.001 |
| Total bile acid | 0-15 μmol/L | 12.3 (7.0-24.1) | 5.6 (3.1-11.1) | <0.001 |
| Alkaline phosphatase | 40-150 U/L | 81.0 (57.3-147.2) | 62.0 (50.3-78.9) | <0.001 |
| Adenosine deaminase | 4-18 U/L | 56.0 (35.2-71.7) | 27.6 (20.4-37.2) | <0.001 |
| Cholinesterase | 4000-11000 U/L | 5441 (4399-6474) | 6038 (4949-7089) | 0.002 |
| White blood cell | 3.5-9.5 ×109/L | 2.28 (1.35-3.99) | 2.14 (1.46-3.75) | 0.977 |
| Neutrophil | 1.8-6.3 ×109/L | 1.70 (0.87-2.93) | 1.28 (0.82-2.44) | 0.185 |
| Lymphocyte | 1.1-3.2 ×109/L | 0.49 (0.32-0.70) | 0.53 (0.34-0.91) | 0.081 |
| Monocyte | 0.1-0.6 ×109/L | 0.11 (0.05-0.31) | 0.16 (0.09-0.35) | 0.012 |
| Red blood cell | 4.3-5.8 ×1012/L | 4.6 (4.2-5.1) | 4.5 (4.2-4.9) | 0.046 |
| Hemoglobin | 130-175 g/L | 144 (128-157) | 137 (126-148) | 0.006 |
| Hematocrit | 40-50 % | 41.4 (37.6-44.9) | 39.7 (36.9-43.3) | 0.013 |
| Platelet | 125-350 ×109/L | 41.5 (34.0-64.0) | 60.5 (45.0-78.0) | <0.001 |

SFTS, server fever with thrombocytopenia syndrome; CK-MB, creatinine kinase-myocardial band.

Continuous variables are presented as median (interquartile range); categorical variables are presented as frequencies (percent).

&, Statistical testing by χ2 test.

†, Statistical testing by Mann-Whitney U test.

**Table S2. Distribution of days from onset to end of observation and days from onset of illness.**

| **From onset to end of observation** | ***n*** | **%/range** | **From onset of illness** | ***n*** | **%/range** |
| --- | --- | --- | --- | --- | --- |
| **Dead group (*n*=87)** |  | 1~19 |  |  | 1~16 |
| 1~3 days | 3 | 3.5 | 1~3 days | 10 | 11.5 |
| 4~7 days | 17 | 19.5 | 4~7 days | 49 | 56.3 |
| 8~10 days | 27 | 31.0 | 8~10 days | 25 | 28.7 |
| 11~14 days | 33 | 37.9 | 11~16 days | 3 | 3.5 |
| 15~19 days | 7 | 8.1 |  |  |  |
| **Survival group (*n*=599)** |  | 1~45 |  |  | 1~23 |
| 1~7 days | 19 | 3.2 | 1~3 days | 90 | 15.0 |
| 8~14 days | 162 | 27.0 | 4~7 days | 353 | 58.9 |
| 15~21 days | 249 | 41.6 | 8~10 days | 116 | 19.4 |
| 22~28 days | 144 | 24.0 | 11~14 days | 30 | 5.0 |
| 29~45 days | 25 | 4.2 | 15~23 days | 10 | 1.7 |

**Table S3. Baseline clinical characteristics in training set and test set.**

| **Characteristics** | **Training set (n=480)** | **Test set (n=206)** | ***P*-value** |
| --- | --- | --- | --- |
| Age (years) † | 65 (58-73) | 66 (58-73) | 0.917 |
| Gender (male) & | 236 (49.4) | 93 (45.2) | 0.311 |
| Days from onset † | 6 (4-8) | 6 (4-8) | 0.802 |
| Hospital stay (days)† | 10 (6-15) | 11 (6-16) | 0.408 |
| **Comorbidities, *n* (%)**& |  |  |  |
| Hypertension | 115 (24.0) | 43 (20.9) | 0.379 |
| Diabetes | 83 (17.3) | 25 (12.1) | 0.089 |
| Coronary artery disease | 39 (8.1) | 13 (6.3) | 0.411 |
| Chronic liver disease | 120 (25.0) | 53 (25.7) | 0.841 |
| Cerebrovascular disease | 43 (9.0) | 15 (7.3) | 0.469 |
| Chronic lung disease | 69 (14.4) | 19 (9.2) | 0.064 |
| Cancer | 12 (2.5) | 8 (3.9) | 0.324 |
| **Complications, *n* (%)**& |  |  |  |
| Myocardial injury | 280 (58.3) | 116 (56.3) | 0.623 |
| Liver injury | 177 (36.9) | 83 (40.3) | 0.398 |
| Renal injury | 81 (16.9) | 35 (17.0) | 0.971 |
| Central nervous system lesion | 64 (13.3) | 14 (6.8) | 0.013 |
| Bleeding | 30 (6.3) | 15 (7.3) | 0.617 |
| Pulmonary infection | 202 (42.1) | 83 (40.3) | 0.662 |
| Multiple organ dysfunction syndrome | 272 (56.7) | 116 (56.3) | 0.931 |
| Acid-base imbalance | 72 (15.0) | 27 (13.1) | 0.518 |
| Electrolyte imbalance | 189 (39.4) | 80 (38.8) | 0.894 |
| **Laboratory findings**† |  |  |  |
| cardiac troponin I | 0.054 (0.020-1.140) | 0.047 (0.022-0.131) | 0.925 |
| Aspartic transaminase | 146 (72-296) | 139 (65-306) | 0.611 |
| Lactate dehydrogenase | 634 (385-900) | 637 (380-900) | 0.861 |
| Creatine kinase | 482 (214-1252) | 434 (161-1038) | 0.051 |
| CK-MB | 19.0 (12.0-32.0) | 17.0 (12.0-32.0) | 0.562 |
| Blood urea nitrogen | 6.01 (4.33-8.55) | 5.14 (3.77-7.55) | 0.001 |
| Creatinine | 67.0 (56.3-85.0) | 62.2 (51.0-77.0) | 0.002 |
| Uric acid | 259 (194-340) | 245 (187-309) | 0.081 |
| Alanine aminotransferase | 69.1 (41.4-138.5) | 75.6 (40.0-134.0) | 0.495 |
| Total bilirubin | 10.0 (7.5-13.6) | 10.3 (7.7-13.2) | 0.395 |
| Direct bilirubin | 4.40 (3.30-6.32) | 4.64 (3.48-6.70) | 0.449 |
| Total protein | 56.9 (52.9-60.7) | 57.0 (52.3-61.7) | 0.757 |
| Albumin | 31.6 (28.7-34.0) | 31.5 (27.7-35.0) | 0.606 |
| Globulin | 25.4 (22.5-27.9) | 25.8 (23.0-29.0) | 0.133 |
| γ-glutamyl transferase | 32.2 (21.0-65.0) | 37.5 (20.9-85.9) | 0.162 |
| Total bile acid | 6.3 (3.4-12.3) | 6.6 (3.2-12.5) | 0.803 |
| Alkaline phosphatase | 63.0 (51.0-81.0) | 64.5 (51.0-85.0) | 0.696 |
| Adenosine deaminase | 29.2 (21.2-41.3) | 29.0 (20.8-41.6) | 0.957 |
| Cholinesterase | 5885 (4814-6952) | 6123 (5065-7107) | 0.139 |
| White blood cell | 2.16 (1.43-3.59) | 2.18 (1.47-4.08) | 0.593 |
| Neutrophil | 1.28 (0.83-2.44) | 1.34 (0.81-2.56) | 0.809 |
| Lymphocyte | 0.50 (0.32-0.86) | 0.57 (0.35-0.97) | 0.075 |
| Monocyte | 0.14 (0.08-0.35) | 0.17 (0.08-0.36) | 0.226 |
| Red blood cell | 4.56 (4.23-4.94) | 4.44 (4.10-4.79) | 0.019 |
| Hemoglobin | 138 (126-151) | 136 (125-147) | 0.219 |
| Hematocrit | 40.0 (37.1-43.9) | 39.6 (36.9-42.9) | 0.112 |
| Platelet | 58.0 (43.0-75.0) | 60.0 (41.0-77.0) | 0.560 |

SFTS, server fever with thrombocytopenia syndrome; CK-MB, creatinine kinase-myocardial band.

Continuous variables are presented as median (interquartile range); categorical variables are presented as frequencies (percent).

&, Statistical testing by χ2 test.

†, Statistical testing by Mann-Whitney U test.

**Figure S1. Identification of optimal AST cut-off for early hospitalized death in SFTS cases.** (A) Maximally selected rank statistics determined AST = 353 U/L as the optimal cut-off to predict early death; (B) Kaplan-Meier analysis with log-rank test using the AST optimal cut-off demonstrated significant differences in predicting early mortality. AST, aspartic transaminase.


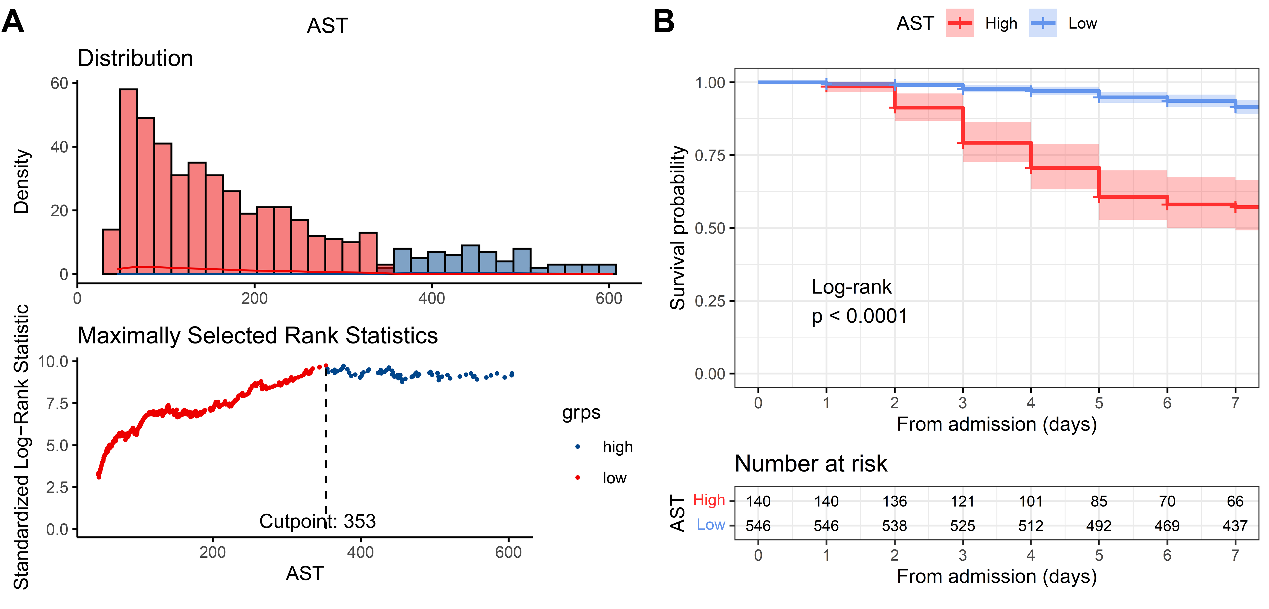


**Figure S2. Identification of optimal LDH cut-off for early hospitalized death in SFTS cases.** (A) Maximally selected rank statistics determined LDH = 894 U/L as the optimal cut-off to predict early death; (B) Kaplan-Meier analysis with log-rank test using the LDH optimal cut-off demonstrated significant differences in predicting early mortality. LDH, lactate dehydrogenase.


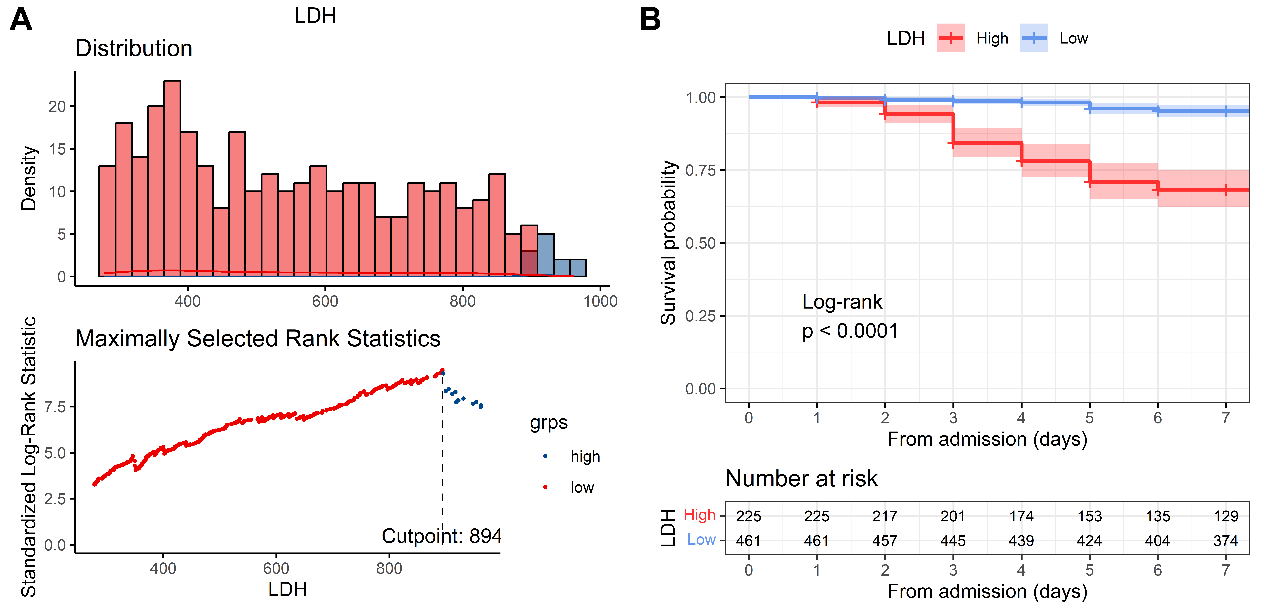


**Figure S3. Identification of optimal CK cut-off for early hospitalized death in SFTS cases.** (A) Maximally selected rank statistics determined CK = 1364 U/L as the optimal cut-off to predict early death; (B) Kaplan-Meier analysis with log-rank test using the CK optimal cut-off demonstrated significant differences in predicting early mortality. CK, creatine kinase.


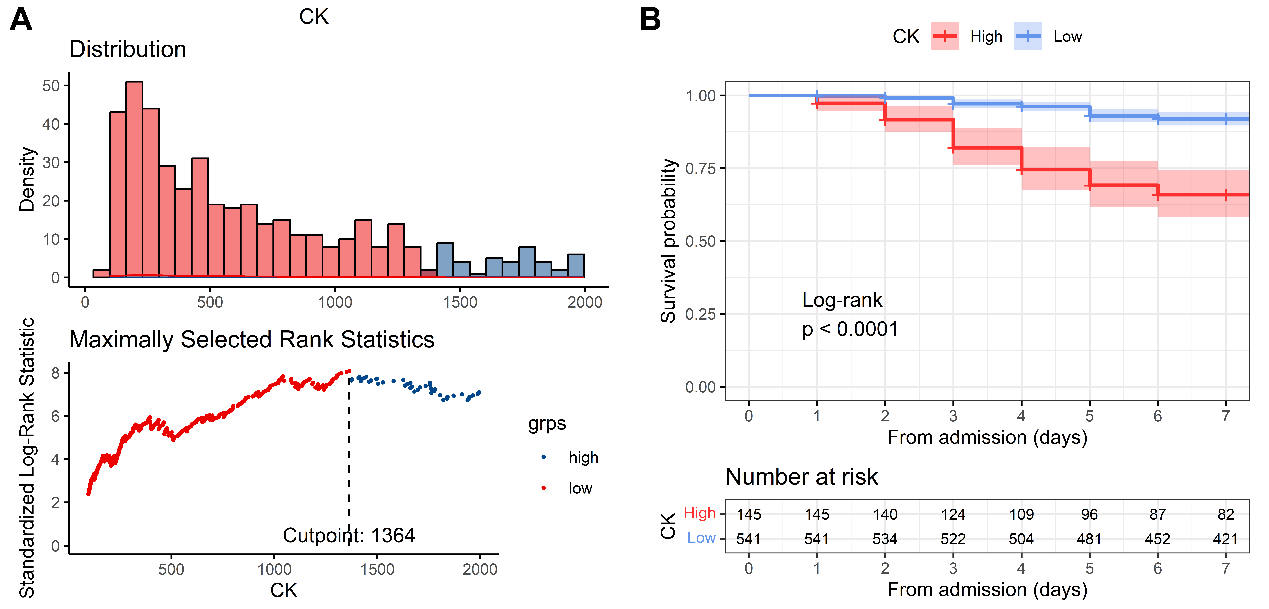


**Figure S4. Identification of optimal CK-MB cut-off for early hospitalized death in SFTS cases.** (A) Maximally selected rank statistics determined CK-MB = 42 U/L as the optimal cut-off to predict early death; (B) Kaplan-Meier analysis with log-rank test using the CK-MB optimal cut-off demonstrated significant differences in predicting early mortality. CK-MB, creatinine kinase-myocardial band.


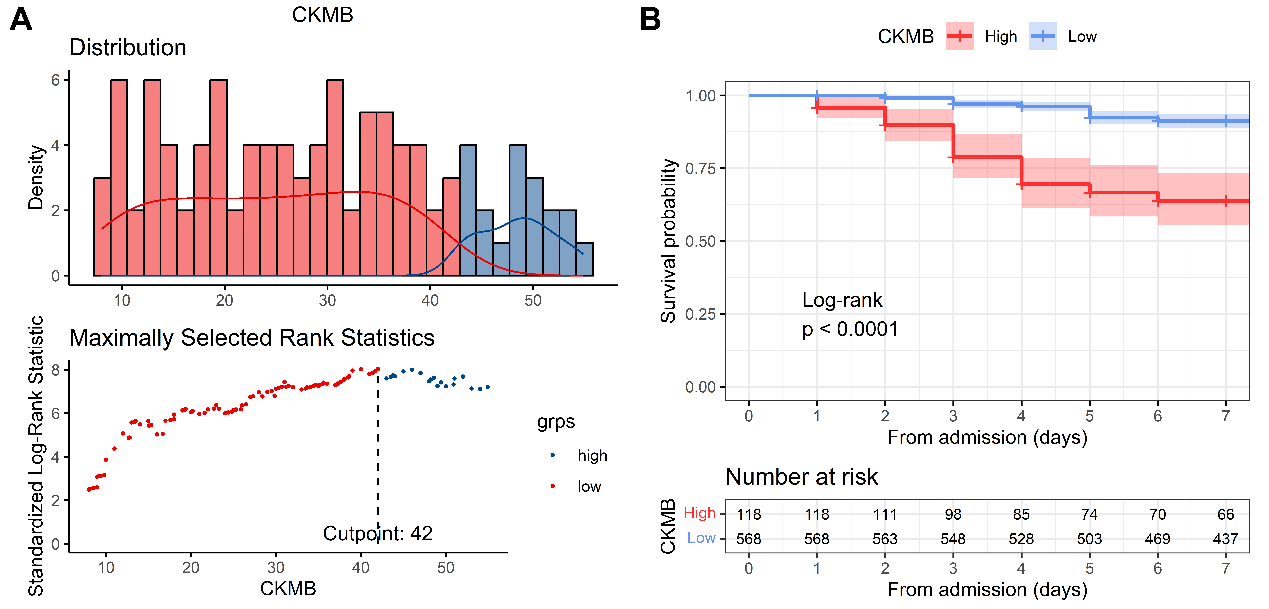

Supplement: Supplementary file 1 [file get_supplementary_file.php]
